# Supplementary material
Source: MDPI journal article supplement (https://www.mdpi.com/2311-7524/9/6/679)
Supplement: s1 [file s1]

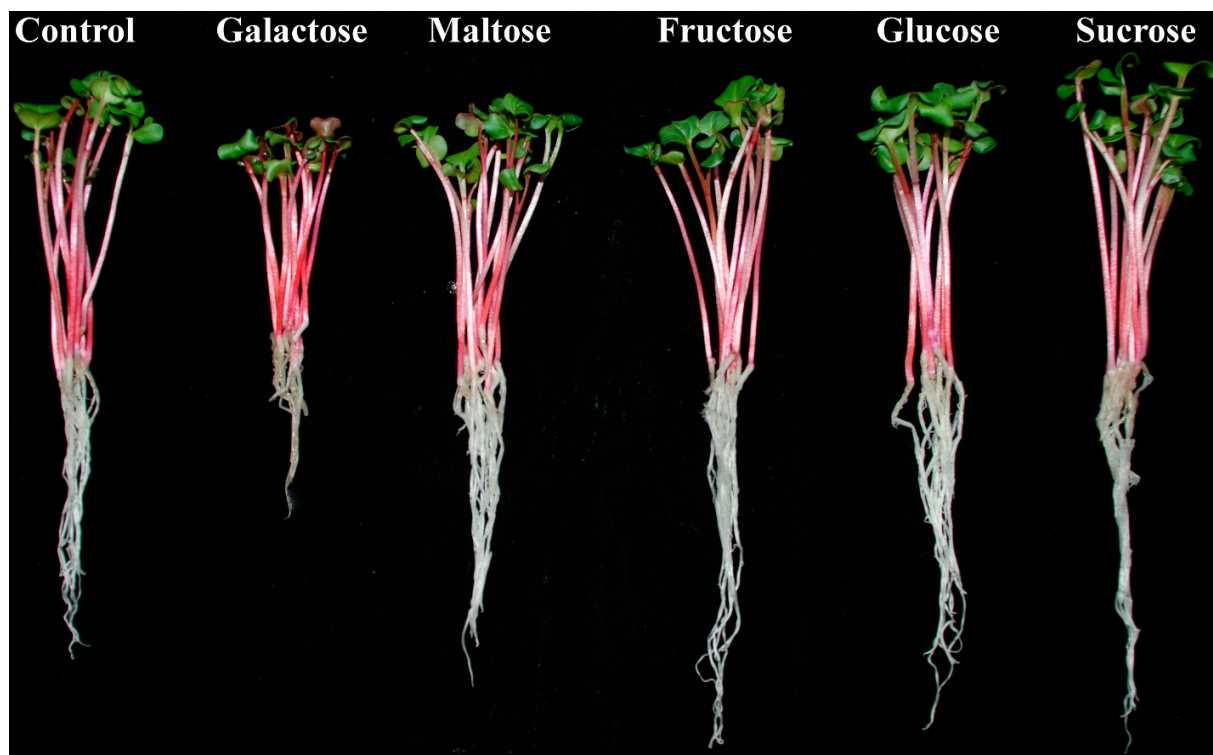

**Figure S1.** Radish sprouts grown under different carbon sources for ten days.

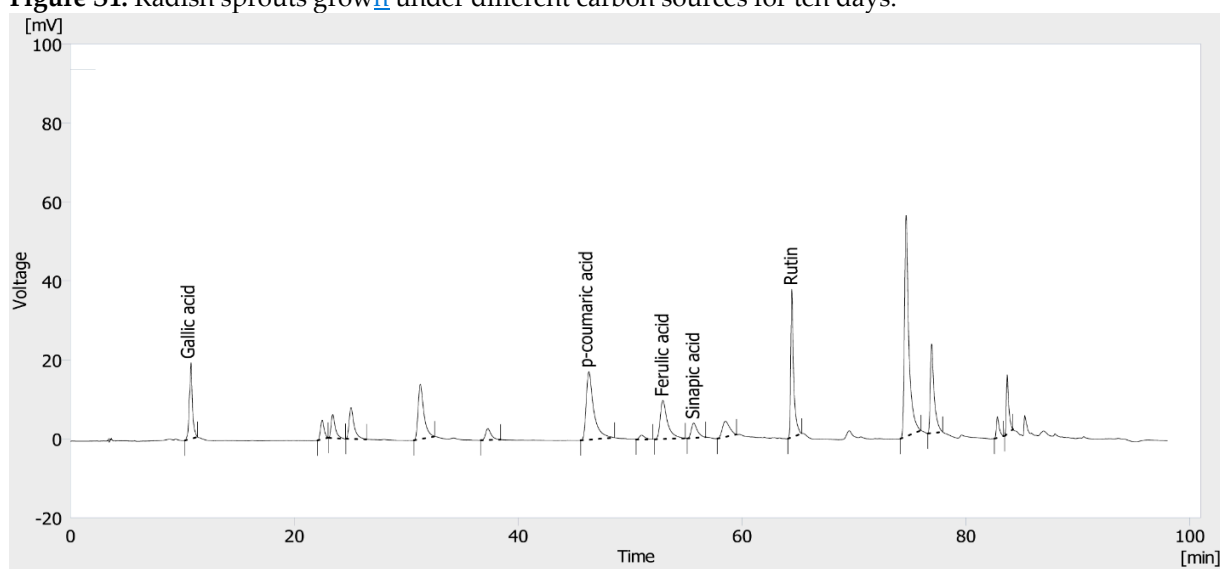

**Figure S2.** HPLC chromatogram of five standard phenolic compounds.

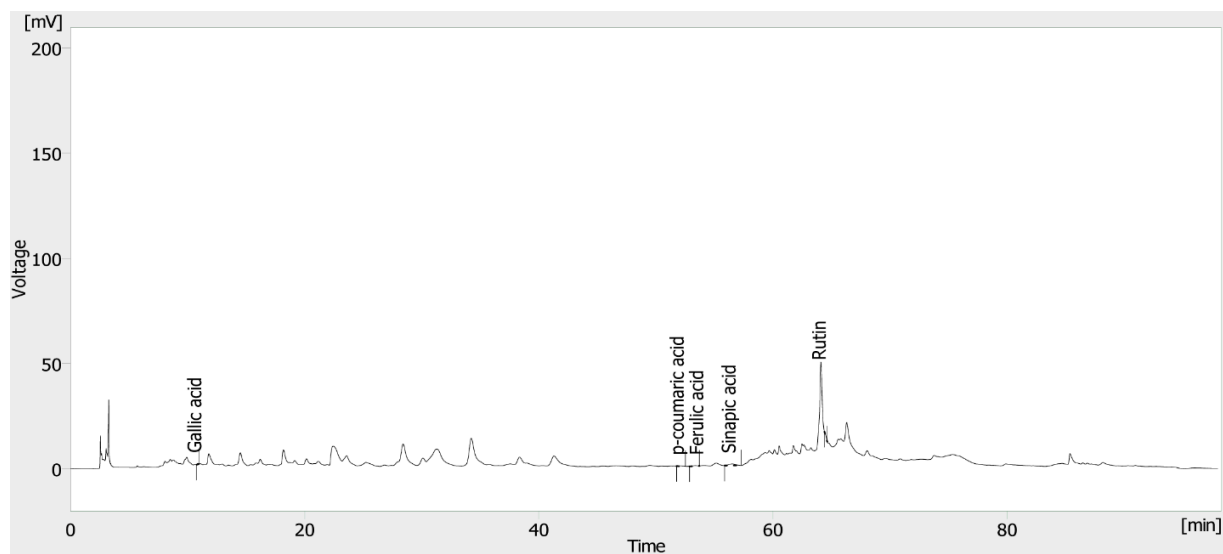

**Figure S3.** HPLC chromatogram of phenolic compounds from radish sprouts untreated with a carbon source (control).

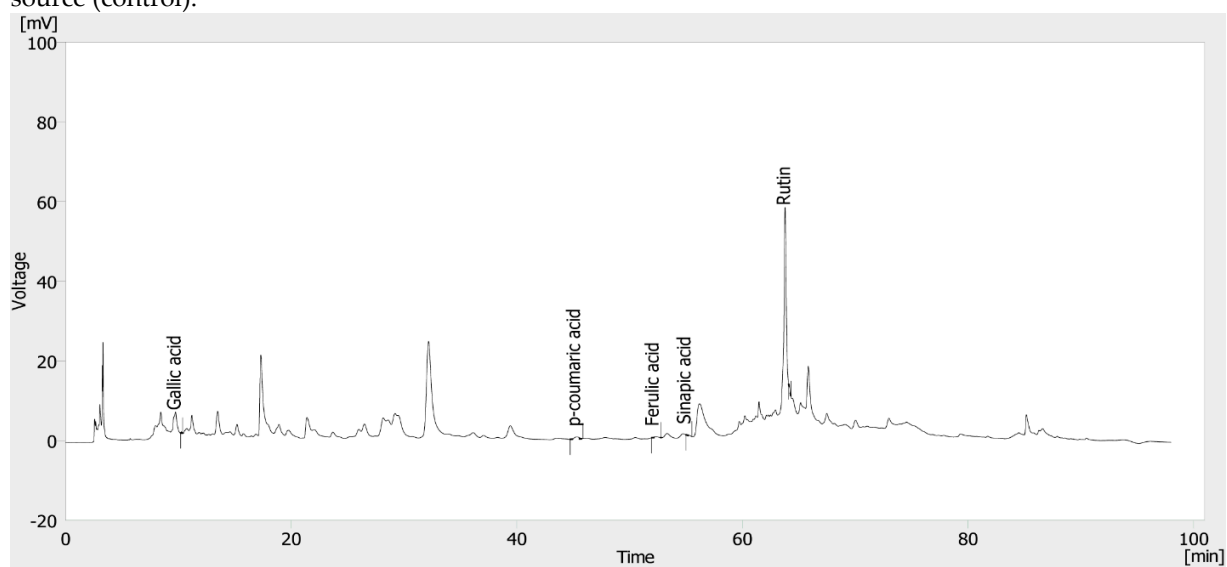

**Figure S4.** HPLC chromatogram of phenolic compounds from radish sprouts exposed to sucrose.
